# Supplementary material
Source: publisher figshare collection journal article supplement (https://sage.figshare.com/ndownloader/files/14939021)
Supplement: Supplementary file 1 [file 14939021]

## Supplemental Materials

**Table S1.** Items Developed for Experience of Delivery of a Dementia Diagnosis

1. The diagnosis was delivered at the right time for me and my family member
2. The diagnosis was explained in a clear manner
3. I was given the opportunity to ask questions about the diagnosis
4. Support options for my (relative's) future were made clear
5. I found the experience of diagnosis overwhelming
6. It was a relief to be given an explanation for my problems
7. It was helpful to have my concerns addressed
8. It was good to hear about the support available
